# Supplementary material
Source: publisher figshare collection journal article supplement (https://acs.figshare.com/ndownloader/files/4722238)
Supplement: Supplementary file 1 [file 4722238]

 
data_lq101601
 
_audit_creation_method            SHELXL-97
_chemical_name_systematic
;
 ?
;
_chemical_name_common             ?
_chemical_melting_point           ?
_chemical_formula_moiety          ?
_chemical_formula_sum
 'C16 H22 O6'
_chemical_formula_weight          310.34
 
loop_
 _atom_type_symbol
 _atom_type_description
 _atom_type_scat_dispersion_real
 _atom_type_scat_dispersion_imag
 _atom_type_scat_source
 'C'  'C'   0.0181   0.0091
 'International Tables Vol C Tables 4.2.6.8 and 6.1.1.4'
 'H'  'H'   0.0000   0.0000
 'International Tables Vol C Tables 4.2.6.8 and 6.1.1.4'
 'O'  'O'   0.0492   0.0322
 'International Tables Vol C Tables 4.2.6.8 and 6.1.1.4'
 
_symmetry_cell_setting            Monoclinic
_symmetry_space_group_name_H-M    'P 2(1)'
 
loop_
 _symmetry_equiv_pos_as_xyz
 'x, y, z'
 '-x, y+1/2, -z'
 
_cell_length_a                    9.4202(8)
_cell_length_b                    6.8832(6)
_cell_length_c                    12.5381(9)
_cell_angle_alpha                 90.00
_cell_angle_beta                  101.540(9)
_cell_angle_gamma                 90.00
_cell_volume                      796.55(11)
_cell_formula_units_Z             2
_cell_measurement_temperature     290(2)
_cell_measurement_reflns_used     82
_cell_measurement_theta_min       7.50
_cell_measurement_theta_max       21.31
 
_exptl_crystal_description        Block
_exptl_crystal_colour             Colorless
_exptl_crystal_size_max           0.40
_exptl_crystal_size_mid           0.40
_exptl_crystal_size_min           0.30
_exptl_crystal_density_meas       ?
_exptl_crystal_density_diffrn     1.294
_exptl_crystal_density_method     'not measured'
_exptl_crystal_F_000              332
_exptl_absorpt_coefficient_mu     0.823
_exptl_absorpt_correction_type    'Semi-empirical'
_exptl_absorpt_correction_T_min   0.7343
_exptl_absorpt_correction_T_max   0.7904
_exptl_absorpt_process_details    ?
 
_exptl_special_details
;
Psi Scans on 12 reflections
;
 
_diffrn_ambient_temperature       290(2)
_diffrn_radiation_wavelength      1.54184
_diffrn_radiation_type            CuK\a
_diffrn_radiation_source          'fine-focus sealed tube'
_diffrn_radiation_monochromator   graphite
_diffrn_measurement_device       'Siemens P4'
_diffrn_measurement_method       '\w/2\q scans'
_diffrn_standards_number            3
_diffrn_standards_interval_count   97
_diffrn_standards_decay_%         ?
_diffrn_reflns_number             2980
_diffrn_reflns_av_R_equivalents   0.0217
_diffrn_reflns_av_sigmaI/netI     0.0263
_diffrn_reflns_limit_h_min        -10
_diffrn_reflns_limit_h_max        9
_diffrn_reflns_limit_k_min        -8
_diffrn_reflns_limit_k_max        8
_diffrn_reflns_limit_l_min        -15
_diffrn_reflns_limit_l_max        15
_diffrn_reflns_theta_min          3.60
_diffrn_reflns_theta_max          67.34
_reflns_number_total              2598
_reflns_number_gt                 2565
_reflns_threshold_expression      >2sigma(I)
 
_computing_data_collection      'Siemens XSCANS'
_computing_cell_refinement      'Siemens XSCANS'
_computing_data_reduction       'Siemens XSCANS'
_computing_structure_solution     'SHELXS-97'
_computing_structure_refinement   'SHELXL-97 (Sheldrick, 1997)'
_computing_molecular_graphics     'ORTEP III for Windows'
_computing_publication_material   ?
 
_refine_special_details
;
 Refinement of F^2^ against ALL reflections.  The weighted R-factor wR and
 goodness of fit S are based on F^2^, conventional R-factors R are based
 on F, with F set to zero for negative F^2^. The threshold expression of
 F^2^ > 2sigma(F^2^) is used only for calculating R-factors(gt) etc. and is
 not relevant to the choice of reflections for refinement.  R-factors based
 on F^2^ are statistically about twice as large as those based on F, and R-
 factors based on ALL data will be even larger.
;
 
_refine_ls_structure_factor_coef  Fsqd
_refine_ls_matrix_type            full
_refine_ls_weighting_scheme       calc
_refine_ls_weighting_details
 'calc w=1/[\s^2^(Fo^2^)+(0.0491P)^2^+0.1041P] where P=(Fo^2^+2Fc^2^)/3'
_atom_sites_solution_primary      direct
_atom_sites_solution_secondary    difmap
_atom_sites_solution_hydrogens    geom
_refine_ls_hydrogen_treatment     mixed
_refine_ls_extinction_method      SHELXL
_refine_ls_extinction_coef        0.0011(7)
_refine_ls_extinction_expression
 'Fc^*^=kFc[1+0.001xFc^2^\l^3^/sin(2\q)]^-1/4^'
_refine_ls_abs_structure_details
 'Flack H D (1983), Acta Cryst. A39, 876-881'
_refine_ls_abs_structure_Flack    0.04(18)
_refine_ls_number_reflns          2598
_refine_ls_number_parameters      200
_refine_ls_number_restraints      1
_refine_ls_R_factor_all           0.0334
_refine_ls_R_factor_gt            0.0331
_refine_ls_wR_factor_ref          0.0878
_refine_ls_wR_factor_gt           0.0874
_refine_ls_goodness_of_fit_ref    1.078
_refine_ls_restrained_S_all       1.078
_refine_ls_shift/su_max           0.002
_refine_ls_shift/su_mean          0.000
 
loop_
 _atom_site_label
 _atom_site_type_symbol
 _atom_site_fract_x
 _atom_site_fract_y
 _atom_site_fract_z
 _atom_site_U_iso_or_equiv
 _atom_site_adp_type
 _atom_site_occupancy
 _atom_site_symmetry_multiplicity
 _atom_site_calc_flag
 _atom_site_refinement_flags
 _atom_site_disorder_assembly
 _atom_site_disorder_group
C1 C 1.5331(2) 0.5389(3) 0.10962(15) 0.0508(4) Uani 1 1 d . . .
C2 C 1.42015(16) 0.5144(2) 0.18063(12) 0.0356(4) Uani 1 1 d . . .
C3 C 1.46869(18) 0.6207(3) 0.28819(14) 0.0446(4) Uani 1 1 d . . .
C4 C 1.39300(18) 0.2970(2) 0.19568(14) 0.0393(4) Uani 1 1 d . . .
H4A H 1.3723 0.2333 0.1253 0.047 Uiso 1 1 calc R . .
H4B H 1.4790 0.2378 0.2390 0.047 Uiso 1 1 calc R . .
C5 C 1.26594(17) 0.2709(2) 0.25221(14) 0.0387(4) Uani 1 1 d . . .
H5A H 1.2396 0.1345 0.2505 0.046 Uiso 1 1 calc R . .
H5B H 1.2954 0.3091 0.3279 0.046 Uiso 1 1 calc R . .
C6 C 1.13474(16) 0.3888(2) 0.20000(11) 0.0291(3) Uani 1 1 d . . .
C7 C 0.99688(17) 0.3337(2) 0.23622(11) 0.0317(3) Uani 1 1 d . . .
H7 H 0.9152 0.4077 0.1950 0.038 Uiso 1 1 calc R . .
C8 C 1.0064(2) 0.3626(2) 0.36032(13) 0.0416(4) Uani 1 1 d . . .
H8A H 1.0904 0.4400 0.3918 0.050 Uiso 1 1 calc R . .
H8B H 0.9201 0.4261 0.3743 0.050 Uiso 1 1 calc R . .
C9 C 1.14240(15) 0.5340(2) 0.13077(10) 0.0285(3) Uani 1 1 d . . .
C10 C 1.01573(18) 0.6486(2) 0.06867(12) 0.0387(4) Uani 1 1 d . . .
H10A H 0.9270 0.5950 0.0823 0.058 Uiso 1 1 calc R . .
H10B H 1.0156 0.6421 -0.0078 0.058 Uiso 1 1 calc R . .
H10C H 1.0240 0.7817 0.0920 0.058 Uiso 1 1 calc R . .
C11 C 1.28539(17) 0.6052(2) 0.10963(12) 0.0357(3) Uani 1 1 d . . .
H11 H 1.2900 0.7461 0.1210 0.043 Uiso 1 1 calc R . .
C12 C 1.3108(2) 0.5632(4) -0.00556(14) 0.0547(5) Uani 1 1 d . . .
H12A H 1.2712 0.4376 -0.0311 0.066 Uiso 1 1 calc R . .
H12B H 1.2662 0.6624 -0.0563 0.066 Uiso 1 1 calc R . .
C13 C 1.6094(3) 0.5971(5) 0.46600(19) 0.0902(9) Uani 1 1 d . . .
H13A H 1.6411 0.7277 0.4574 0.135 Uiso 1 1 calc R . .
H13B H 1.6892 0.5215 0.5040 0.135 Uiso 1 1 calc R . .
H13C H 1.5335 0.5985 0.5069 0.135 Uiso 1 1 calc R . .
C14 C 1.0015(3) -0.1495(3) 0.33651(17) 0.0696(7) Uani 1 1 d . . .
H14A H 1.1027 -0.1463 0.3341 0.104 Uiso 1 1 calc R . .
H14B H 0.9516 -0.2328 0.2798 0.104 Uiso 1 1 calc R . .
H14C H 0.9895 -0.1981 0.4059 0.104 Uiso 1 1 calc R . .
C15 C 0.9402(2) 0.0514(2) 0.32034(12) 0.0396(4) Uani 1 1 d . . .
C16 C 0.7799(3) 0.0622(5) 0.3201(2) 0.0777(8) Uani 1 1 d . . .
H16A H 0.7636 0.0322 0.3914 0.116 Uiso 1 1 calc R . .
H16B H 0.7290 -0.0297 0.2686 0.116 Uiso 1 1 calc R . .
H16C H 0.7452 0.1908 0.3000 0.116 Uiso 1 1 calc R . .
O1 O 1.46733(14) 0.5649(3) 0.00575(11) 0.0635(4) Uani 1 1 d . . .
O2 O 1.66219(15) 0.5341(3) 0.13666(14) 0.0766(5) Uani 1 1 d . . .
O3 O 1.55571(17) 0.5127(3) 0.36033(12) 0.0715(5) Uani 1 1 d . . .
O4 O 1.4334(2) 0.7812(3) 0.30609(15) 0.0863(6) Uani 1 1 d . . .
O6 O 1.01871(14) 0.17189(16) 0.40334(8) 0.0414(3) Uani 1 1 d . . .
05 O 0.96997(13) 0.12872(16) 0.22170(8) 0.0381(3) Uani 1 1 d . . .
 
loop_
 _atom_site_aniso_label
 _atom_site_aniso_U_11
 _atom_site_aniso_U_22
 _atom_site_aniso_U_33
 _atom_site_aniso_U_23
 _atom_site_aniso_U_13
 _atom_site_aniso_U_12
C1 0.0357(11) 0.0633(11) 0.0557(10) 0.0065(9) 0.0146(8) -0.0024(9)
C2 0.0275(8) 0.0413(9) 0.0374(8) 0.0026(7) 0.0052(6) -0.0011(7)
C3 0.0360(9) 0.0511(10) 0.0437(9) 0.0017(8) 0.0007(7) -0.0054(8)
C4 0.0312(9) 0.0407(9) 0.0453(9) 0.0033(6) 0.0064(7) 0.0069(7)
C5 0.0332(9) 0.0372(8) 0.0446(8) 0.0142(7) 0.0052(7) 0.0061(7)
C6 0.0295(8) 0.0300(7) 0.0266(6) 0.0027(5) 0.0029(5) 0.0018(6)
C7 0.0349(8) 0.0280(7) 0.0326(7) 0.0065(6) 0.0075(6) -0.0001(6)
C8 0.0595(11) 0.0282(8) 0.0419(8) -0.0004(6) 0.0218(7) -0.0006(7)
C9 0.0293(7) 0.0291(6) 0.0260(6) 0.0017(5) 0.0028(5) 0.0006(6)
C10 0.0376(9) 0.0416(8) 0.0359(7) 0.0137(7) 0.0050(6) 0.0063(7)
C11 0.0343(9) 0.0375(8) 0.0348(7) 0.0080(6) 0.0057(6) -0.0008(7)
C12 0.0413(10) 0.0858(15) 0.0390(9) 0.0150(9) 0.0127(7) -0.0046(10)
C13 0.099(2) 0.105(2) 0.0498(12) -0.0043(13) -0.0244(12) -0.0220(17)
C14 0.133(2) 0.0320(9) 0.0468(10) 0.0031(8) 0.0243(12) 0.0029(12)
C15 0.0574(10) 0.0326(8) 0.0296(7) 0.0043(6) 0.0107(6) -0.0083(7)
C16 0.0617(14) 0.099(2) 0.0772(15) 0.0108(14) 0.0259(11) -0.0287(14)
O1 0.0454(8) 0.0999(12) 0.0505(7) 0.0149(8) 0.0220(6) -0.0035(8)
O2 0.0318(8) 0.1107(14) 0.0900(11) 0.0127(11) 0.0187(7) -0.0007(8)
O3 0.0742(10) 0.0760(10) 0.0500(8) 0.0001(8) -0.0221(7) 0.0036(9)
O4 0.1076(14) 0.0642(10) 0.0716(10) -0.0223(8) -0.0192(10) 0.0142(10)
O6 0.0637(8) 0.0328(6) 0.0274(5) 0.0003(4) 0.0084(5) 0.0007(5)
05 0.0517(7) 0.0350(6) 0.0275(5) 0.0008(4) 0.0075(4) -0.0138(5)
 
_geom_special_details
;
 All esds (except the esd in the dihedral angle between two l.s. planes)
 are estimated using the full covariance matrix.  The cell esds are taken
 into account individually in the estimation of esds in distances, angles
 and torsion angles; correlations between esds in cell parameters are only
 used when they are defined by crystal symmetry.  An approximate (isotropic)
 treatment of cell esds is used for estimating esds involving l.s. planes.
;
 
loop_
 _geom_bond_atom_site_label_1
 _geom_bond_atom_site_label_2
 _geom_bond_distance
 _geom_bond_site_symmetry_2
 _geom_bond_publ_flag
C1 O2 1.196(2) . ?
C1 O1 1.338(2) . ?
C1 C2 1.527(2) . ?
C2 C3 1.522(2) . ?
C2 C11 1.531(2) . ?
C2 C4 1.536(2) . ?
C3 O4 1.188(3) . ?
C3 O3 1.321(2) . ?
C4 C5 1.519(2) . ?
C5 C6 1.514(2) . ?
C6 C9 1.335(2) . ?
C6 C7 1.508(2) . ?
C7 05 1.4383(19) . ?
C7 C8 1.553(2) . ?
C8 O6 1.4153(19) . ?
C9 C11 1.506(2) . ?
C9 C10 1.5103(19) . ?
C11 C12 1.538(2) . ?
C12 O1 1.453(2) . ?
C13 O3 1.443(3) . ?
C14 C15 1.496(3) . ?
C15 O6 1.417(2) . ?
C15 05 1.4246(18) . ?
C15 C16 1.512(3) . ?
 
loop_
 _geom_angle_atom_site_label_1
 _geom_angle_atom_site_label_2
 _geom_angle_atom_site_label_3
 _geom_angle
 _geom_angle_site_symmetry_1
 _geom_angle_site_symmetry_3
 _geom_angle_publ_flag
O2 C1 O1 121.77(17) . . ?
O2 C1 C2 128.26(17) . . ?
O1 C1 C2 109.96(15) . . ?
C3 C2 C1 110.03(14) . . ?
C3 C2 C11 112.71(14) . . ?
C1 C2 C11 102.07(13) . . ?
C3 C2 C4 112.79(14) . . ?
C1 C2 C4 109.39(15) . . ?
C11 C2 C4 109.29(13) . . ?
O4 C3 O3 123.56(19) . . ?
O4 C3 C2 124.65(18) . . ?
O3 C3 C2 111.79(16) . . ?
C5 C4 C2 109.83(13) . . ?
C6 C5 C4 112.71(13) . . ?
C9 C6 C7 123.09(13) . . ?
C9 C6 C5 122.48(13) . . ?
C7 C6 C5 114.38(12) . . ?
05 C7 C6 110.44(12) . . ?
05 C7 C8 103.07(11) . . ?
C6 C7 C8 112.88(13) . . ?
O6 C8 C7 104.28(12) . . ?
C6 C9 C11 121.64(13) . . ?
C6 C9 C10 125.90(13) . . ?
C11 C9 C10 112.43(12) . . ?
C9 C11 C2 115.57(12) . . ?
C9 C11 C12 114.63(13) . . ?
C2 C11 C12 101.68(13) . . ?
O1 C12 C11 104.62(14) . . ?
O6 C15 05 104.75(12) . . ?
O6 C15 C14 108.11(15) . . ?
05 C15 C14 108.98(15) . . ?
O6 C15 C16 110.31(16) . . ?
05 C15 C16 110.47(16) . . ?
C14 C15 C16 113.8(2) . . ?
C1 O1 C12 110.93(13) . . ?
C3 O3 C13 117.2(2) . . ?
C8 O6 C15 105.78(12) . . ?
C15 05 C7 108.46(11) . . ?
 
loop_
 _geom_torsion_atom_site_label_1
 _geom_torsion_atom_site_label_2
 _geom_torsion_atom_site_label_3
 _geom_torsion_atom_site_label_4
 _geom_torsion
 _geom_torsion_site_symmetry_1
 _geom_torsion_site_symmetry_2
 _geom_torsion_site_symmetry_3
 _geom_torsion_site_symmetry_4
 _geom_torsion_publ_flag
O2 C1 C2 C3 40.8(3) . . . . ?
O1 C1 C2 C3 -140.35(18) . . . . ?
O2 C1 C2 C11 160.7(3) . . . . ?
O1 C1 C2 C11 -20.5(2) . . . . ?
O2 C1 C2 C4 -83.6(3) . . . . ?
O1 C1 C2 C4 95.22(19) . . . . ?
C1 C2 C3 O4 94.9(2) . . . . ?
C11 C2 C3 O4 -18.3(3) . . . . ?
C4 C2 C3 O4 -142.6(2) . . . . ?
C1 C2 C3 O3 -85.07(19) . . . . ?
C11 C2 C3 O3 161.73(15) . . . . ?
C4 C2 C3 O3 37.4(2) . . . . ?
C3 C2 C4 C5 65.28(18) . . . . ?
C1 C2 C4 C5 -171.91(13) . . . . ?
C11 C2 C4 C5 -60.93(17) . . . . ?
C2 C4 C5 C6 49.40(19) . . . . ?
C4 C5 C6 C9 -15.6(2) . . . . ?
C4 C5 C6 C7 166.76(13) . . . . ?
C9 C6 C7 05 128.84(14) . . . . ?
C5 C6 C7 05 -53.52(16) . . . . ?
C9 C6 C7 C8 -116.38(15) . . . . ?
C5 C6 C7 C8 61.26(17) . . . . ?
05 C7 C8 O6 13.38(17) . . . . ?
C6 C7 C8 O6 -105.77(15) . . . . ?
C7 C6 C9 C11 170.41(14) . . . . ?
C5 C6 C9 C11 -7.0(2) . . . . ?
C7 C6 C9 C10 -7.5(2) . . . . ?
C5 C6 C9 C10 175.05(15) . . . . ?
C6 C9 C11 C2 -5.8(2) . . . . ?
C10 C9 C11 C2 172.36(13) . . . . ?
C6 C9 C11 C12 111.98(17) . . . . ?
C10 C9 C11 C12 -69.85(18) . . . . ?
C3 C2 C11 C9 -86.88(17) . . . . ?
C1 C2 C11 C9 155.14(15) . . . . ?
C4 C2 C11 C9 39.38(18) . . . . ?
C3 C2 C11 C12 148.33(15) . . . . ?
C1 C2 C11 C12 30.34(17) . . . . ?
C4 C2 C11 C12 -85.42(16) . . . . ?
C9 C11 C12 O1 -156.48(15) . . . . ?
C2 C11 C12 O1 -31.05(19) . . . . ?
O2 C1 O1 C12 179.4(2) . . . . ?
C2 C1 O1 C12 0.5(2) . . . . ?
C11 C12 O1 C1 19.8(2) . . . . ?
O4 C3 O3 C13 0.0(3) . . . . ?
C2 C3 O3 C13 -180.0(2) . . . . ?
C7 C8 O6 C15 -31.54(17) . . . . ?
05 C15 O6 C8 38.20(17) . . . . ?
C14 C15 O6 C8 154.31(15) . . . . ?
C16 C15 O6 C8 -80.68(18) . . . . ?
O6 C15 05 C7 -29.27(16) . . . . ?
C14 C15 05 C7 -144.77(16) . . . . ?
C16 C15 05 C7 89.50(18) . . . . ?
C6 C7 05 C15 130.37(13) . . . . ?
C8 C7 05 C15 9.54(16) . . . . ?
 
_diffrn_measured_fraction_theta_max    0.961
_diffrn_reflns_theta_full              67.34
_diffrn_measured_fraction_theta_full   0.961
_refine_diff_density_max    0.140
_refine_diff_density_min   -0.157
_refine_diff_density_rms    0.036
